# Supplementary material
Source: PubMed Central journal article supplement (PMC3816615)
Supplement: supp_13-12687_IOVS-13-12687-s01.pdf [file supp_13-12687_IOVS-13-12687-s01.pdf]

| Genotype                                                 | # limbs examined | Normal appearance | Syndactyly |
|----------------------------------------------------------|------------------|-------------------|------------|
| <i>Fbn2</i> <sup>-/-</sup>                               | 100 (25 mice)    | 76                | 24         |
| <i>Fbn2</i> <sup>-/-</sup> ; <i>Mfap2</i> <sup>-/-</sup> | 12 (3 mice)      | 8                 | 4          |

Supplemental Table 1. Incidence of syndactyly in fibrillin-2-null mice.

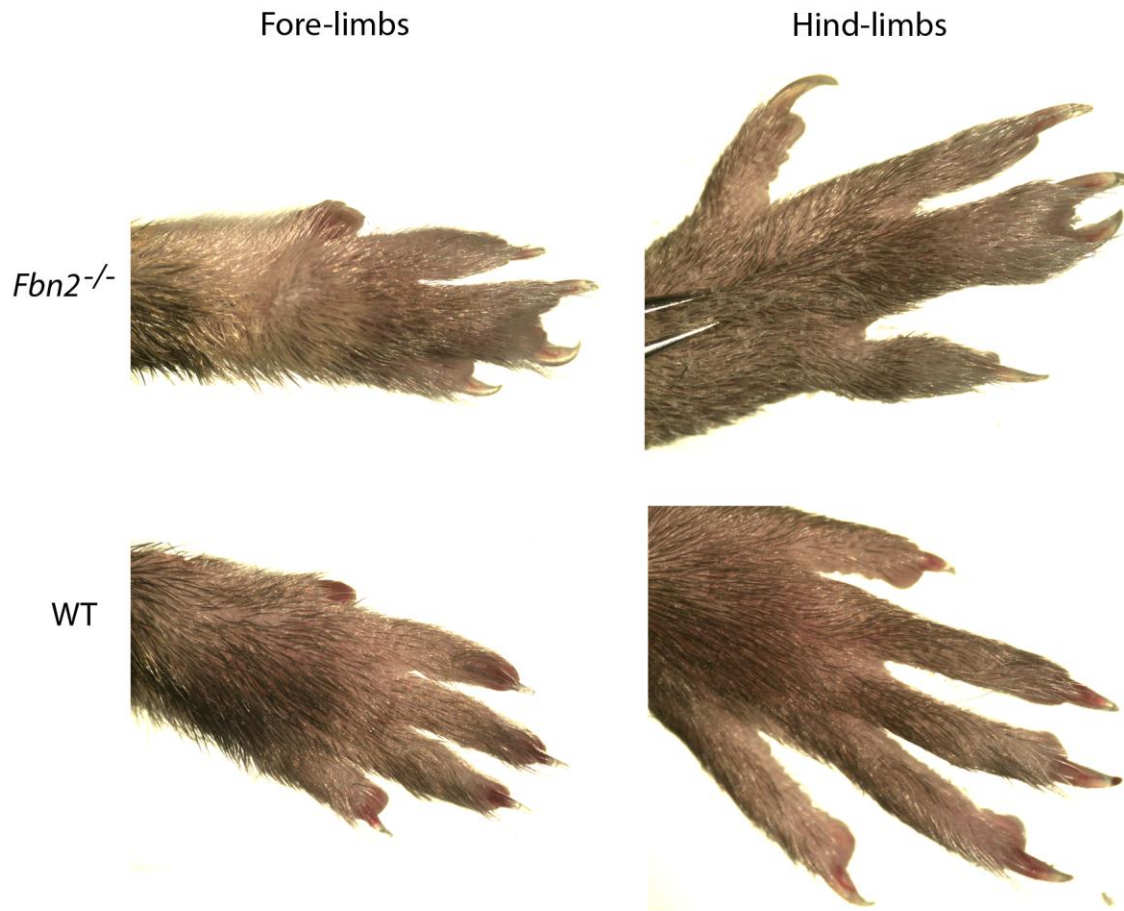

Supplemental Figure 1. Syndactyly in 12-week-old *Fbn2*<sup>-/-</sup> mice. Syndactyly (fusion of third and fourth digits of the fore- or hind-limbs) was observed in a proportion of *Fbn2*<sup>-/-</sup> mice but not in wildtypes (WT).

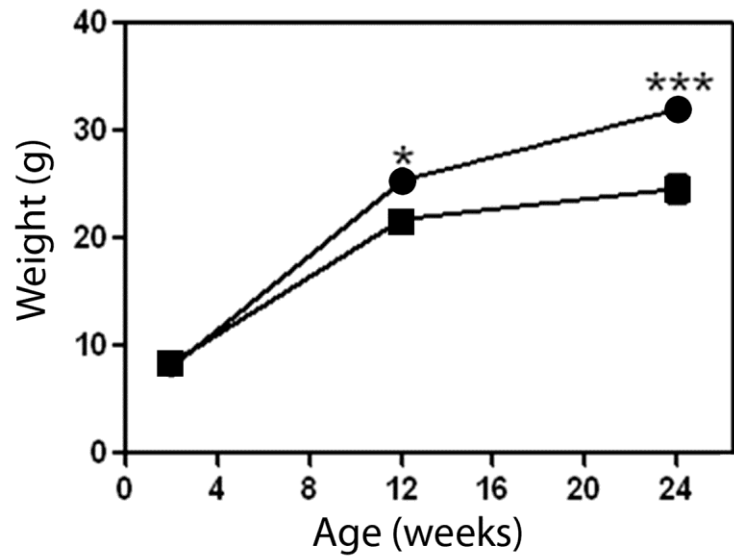

Supplemental Figure 2.

Growth rates of wildtype (filled circles) and *Fbn2*<sup>-/-</sup> (filled squares) mice. Although similar in size at two weeks of age, adult *Fbn2*<sup>-/-</sup> mice are significantly smaller than age-matched wildtype (C57BL/6) mice.

Data represent mean of 3-6 measurements at each time point  $\pm$  SD (error bars lie within the data symbols). \*  $p < 0.05$ , \*\*\*  $p < 0.001$ .

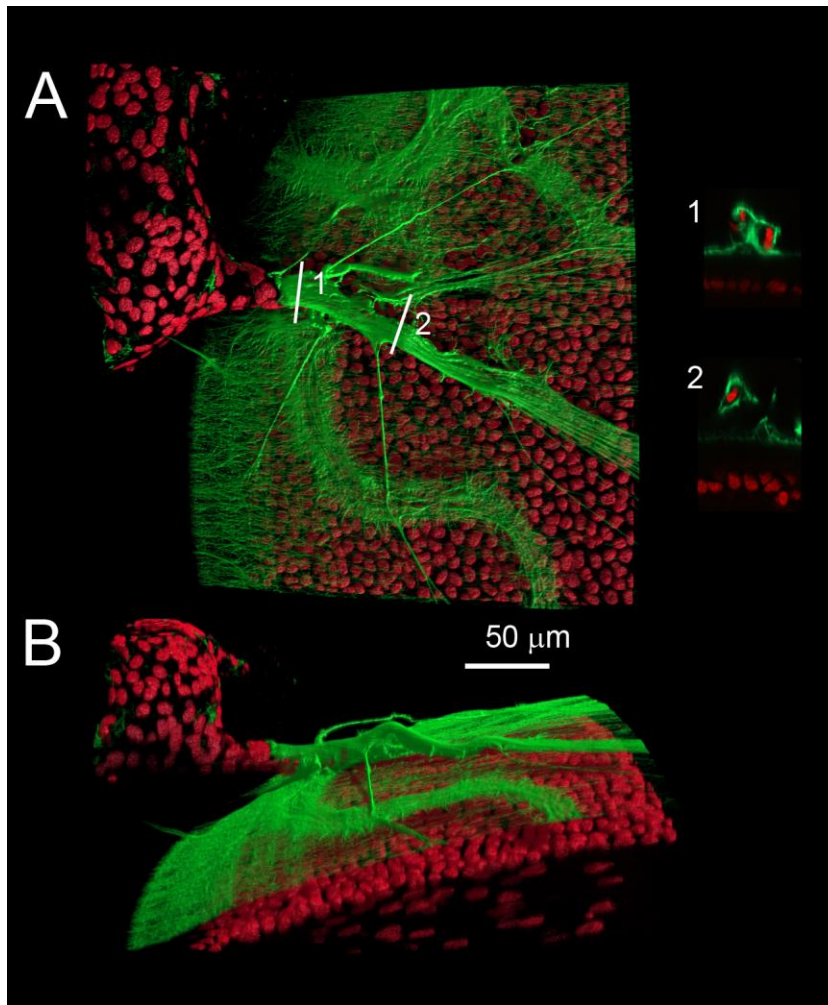

Supplemental Figure 3. Blood vessels are incorporated into the persistent pupillary membrane of *Fbn2*<sup>-/-</sup> eyes. A. Three dimensional reconstruction of colobomatous iris and underlying lens tissue. Orthogonal sections through two regions of the vascular structure reveal a lumen and nucleated cells. B. Oblique view showing blood vessels projecting from the ciliary body to the surface of the lens.

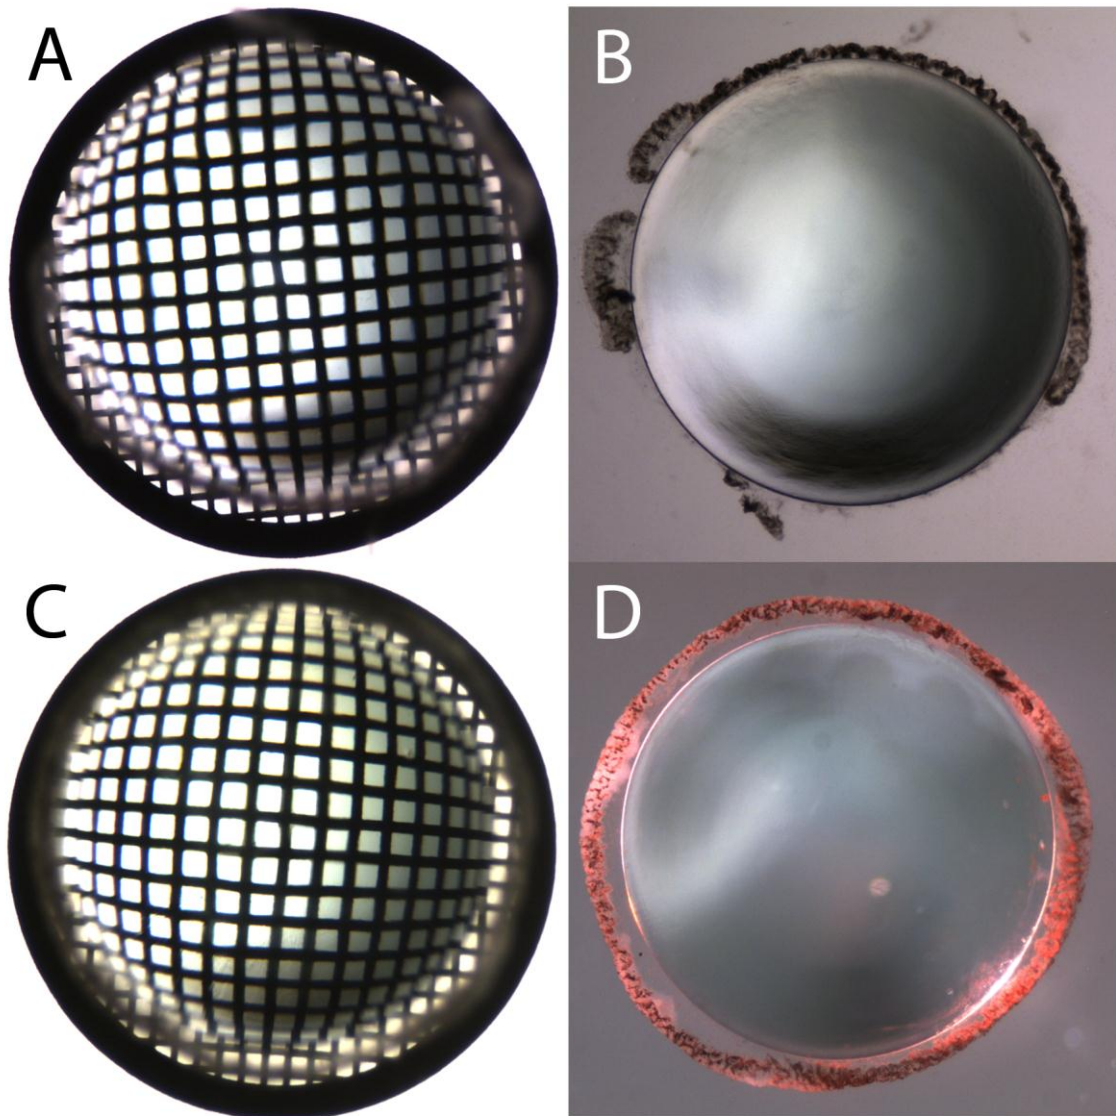

Supplemental Figure 4

Refractive properties and transparency are comparable in lenses from wildtype (A, B) and *Fbn2*<sup>-/-</sup> mice (C, D).
